# Supplementary material for: Attitudes and training needs of government schoolteachers on intervening in sexual and reproductive health issues of students in Colombo Education Zone of Sri Lanka- a lower middle-income country
Source: Research Square preprint supplement (doi:10.21203/rs.3.rs-8574523/v1), 2026-02-12
Supplement: Supplementary file 1 [file 479d5ff52d6278ec32a22b1f.docx]

Annex 1: Questionnaire - English

**Confidential**

**For office use only:**

Serial number: …………… Type of school: 1AB / 1C / 2

Date: dd / mm / yyyy

**Questionnaire on the study self-perceived confidence, attitudes and training needs of government schoolteachers in Colombo Education Zone on addressing the sexual and reproductive health issues of students and factors associated with self-perceived confidence**

Please answer all the questions.

**Section 1: Socio demographic details and teaching related factors**

1. Sex : a. Male  b. Female
2. Age : ……………

*(Completed as of to the date of data collection)*

1. Ethnicity : a. Sinhalese

b. Tamil

c. Muslim

d. Burgher

e. Other (Specify) ……………….

1. Religion : a. Buddhism

b. Hinduism

c. Islam

d. Christian /Catholic

e. Other (Specify) ……………….

1. Marital status : a. Currently married

b. Unmarried

c. Separated / Divorced / Widowed

1. Do you have a child in adolescent age group?

a. Yes  b. No

1. Highest educational qualification:

G.C.E. A/L Science / Commerce / Arts / Others

Degree

Post graduate diploma

Masters

Others (Specify) ……………….

1. What is/are your subject/s of teaching?

……………………………………………………………………………

1. What is the duration of your service since the first appointment? Years, months
2. Have you involved in teaching sexual and reproductive health?

a. Yes  b. No

*If No, go to question number 11*

If yes, how many sessions? ……...…..

1. Have you involved in providing health education talk on sexual and reproductive health?

a. Yes  b. No

*If No, go to question number 12*

If yes, how many sessions? ……...…..

1. Have you dealt with adolescent issues related sexual and reproductive health?

a. Yes  b. No

*If No, go to question number 13*

If yes, how many incidents? ……...…..

1. Have you had any training on teaching sexual and reproductive health?

a. Yes  b. No

*If No, go to question number 15*

If yes,

1. Type of training obtained: *(Mark all applicable)*

In-service  Number of in-service trainings attended: ……

Pre-service

1. Adequacy of training as perceived by you :

a. Satisfactory  b. Unsatisfactory

1. Does your school provide adequate emphesis to the level you expect on teaching sexual and reproductive health?

a. Yes  b. No

1. Are there audio – visual facilities to provide sexual and reproductive health education?

a. Yes  b. No

1. Are there materials available to conduct sexual and reproductive health related activities?

a. Yes  b. No

1. Is there a confidential environment available to deal with sexual and reproductive health related issues?

a. Yes  b. No

1. Are you aware of the provision of services related to sexual and reproductive health by the Office of the Medical Officer of Health?

a. Yes  b. No

**Section 2: Self – perceived confidence**

Rate your level of confidence in the following scenarios *(Circle the most appropriate number)*

Confidence level: 1 – Least confident 10 – Most confident

| 1. If you are given the task of teaching the subject matter in the text book in relation to sexual and reproductive health | **Confidence Level** | | | | | | | | | |
| --- | --- | --- | --- | --- | --- | --- | --- | --- | --- | --- |
| 1. Reproductive system | 1 | 2 | 3 | 4 | 5 | 6 | 7 | 8 | 9 | 10 |
| 1. Secondary sexual features | 1 | 2 | 3 | 4 | 5 | 6 | 7 | 8 | 9 | 10 |
| 1. Menstrual cycle | 1 | 2 | 3 | 4 | 5 | 6 | 7 | 8 | 9 | 10 |
| 1. Fertilization and implantation | 1 | 2 | 3 | 4 | 5 | 6 | 7 | 8 | 9 | 10 |
| 1. Development of foetus | 1 | 2 | 3 | 4 | 5 | 6 | 7 | 8 | 9 | 10 |
| 1. Child birth | 1 | 2 | 3 | 4 | 5 | 6 | 7 | 8 | 9 | 10 |
| 1. Challenges faced by adolescents | 1 | 2 | 3 | 4 | 5 | 6 | 7 | 8 | 9 | 10 |
| 1. Sexual harassment and abuse | 1 | 2 | 3 | 4 | 5 | 6 | 7 | 8 | 9 | 10 |
| 1. Teenage pregnancies | 1 | 2 | 3 | 4 | 5 | 6 | 7 | 8 | 9 | 10 |
| 1. Unplanned pregnancies | 1 | 2 | 3 | 4 | 5 | 6 | 7 | 8 | 9 | 10 |
| 1. Sexually transmitted diseases | 1 | 2 | 3 | 4 | 5 | 6 | 7 | 8 | 9 | 10 |
| 1. Gender responsibilities | 1 | 2 | 3 | 4 | 5 | 6 | 7 | 8 | 9 | 10 |
| 1. Sexuality related myth busting | 1 | 2 | 3 | 4 | 5 | 6 | 7 | 8 | 9 | 10 |
| 1. Doing a health education talk | **Confidence Level** | | | | | | | | | |
| 1. To students on |
| 1. Reproductive system | 1 | 2 | 3 | 4 | 5 | 6 | 7 | 8 | 9 | 10 |
| 1. Sexual practices | 1 | 2 | 3 | 4 | 5 | 6 | 7 | 8 | 9 | 10 |
| 1. Sexuality related myth busting | 1 | 2 | 3 | 4 | 5 | 6 | 7 | 8 | 9 | 10 |
| 1. To parents | **Confidence Level** | | | | | | | | | |
| 1. Reproductive system | 1 | 2 | 3 | 4 | 5 | 6 | 7 | 8 | 9 | 10 |
| 1. Sexual practices | 1 | 2 | 3 | 4 | 5 | 6 | 7 | 8 | 9 | 10 |
| 1. Sexuality related myth busting | 1 | 2 | 3 | 4 | 5 | 6 | 7 | 8 | 9 | 10 |
| 1. Dealing with sexual and reproductive health issues | **Confidence Level** | | | | | | | | | |
| 1. Can handle the issue on your own | 1 | 2 | 3 | 4 | 5 | 6 | 7 | 8 | 9 | 10 |
| 1. Some unhealthy behaviour observed in the school | 1 | 2 | 3 | 4 | 5 | 6 | 7 | 8 | 9 | 10 |
| 1. Some question is asked by a student in private | 1 | 2 | 3 | 4 | 5 | 6 | 7 | 8 | 9 | 10 |
| 1. Some question is asked by a student in public | 1 | 2 | 3 | 4 | 5 | 6 | 7 | 8 | 9 | 10 |
| 1. When a public complaint is received | 1 | 2 | 3 | 4 | 5 | 6 | 7 | 8 | 9 | 10 |
| 1. When complaint is received from another student | 1 | 2 | 3 | 4 | 5 | 6 | 7 | 8 | 9 | 10 |
| 1. In relation to above three (1, 2, 3) | **Confidence Level** | | | | | | | | | |
| 1. Controlling sarcasm of students | 1 | 2 | 3 | 4 | 5 | 6 | 7 | 8 | 9 | 10 |
| 1. Answering questions raised by students / parents | 1 | 2 | 3 | 4 | 5 | 6 | 7 | 8 | 9 | 10 |
| 1. Way of using terminology | 1 | 2 | 3 | 4 | 5 | 6 | 7 | 8 | 9 | 10 |
| 1. Secure use of digital devices, internet and social media | 1 | 2 | 3 | 4 | 5 | 6 | 7 | 8 | 9 | 10 |
| 1. Law and legal system related to sexual and reproductive health | 1 | 2 | 3 | 4 | 5 | 6 | 7 | 8 | 9 | 10 |
| 1. Scope recommended within the policies | 1 | 2 | 3 | 4 | 5 | 6 | 7 | 8 | 9 | 10 |

**Section 3: Attitudes**

| **Statements** | **Responses** | | | | |
| --- | --- | --- | --- | --- | --- |
| **Strongly Disagree** | **Disagree** | **Undecided** | **Agree** | **Strongly Agree** |
| 1. Sexual and reproductive health education is adequately addressed in the current curriculum. |  |  |  |  |  |
| 1. Sexual and reproductive health education classes should be taken separately for boys and girls |  |  |  |  |  |
| 1. Sexual and reproductive health education should be taught by a teacher of same gender |  |  |  |  |  |
| 1. Only a dedicated teacher with training should teach sexual and reproductive health education |  |  |  |  |  |
| 1. Sexual and reproductive health education may promote early sexual activity among learners |  |  |  |  |  |
| 1. It is better to teach sexual and reproductive health education by a health staff (eg: doctor) |  |  |  |  |  |
| 1. Ideal age for the commencement of sexual and reproductive health education is after 15 years |  |  |  |  |  |
| 1. Sexual and reproductive health should be identified as a separate subject |  |  |  |  |  |
| 1. Sexual and reproductive health should be included as a separate subject in the national examinations |  |  |  |  |  |
| 1. There could be parental / societal / religious opposition when imparting sexual and reproductive health education |  |  |  |  |  |
| 1. Teacher will have unnecessary consequences from the society when addressing sexual and reproductive health issues |  |  |  |  |  |
| 1. There is a favourable environment to impart sexual and reproductive health education at school |  |  |  |  |  |

**Section 4: Training need assessment**

In order to perform your job effectively you need relevant skills.

You will see listed below a range of skilled activities many of which you undertake in performing your job.

Look at each of these activities and then rate each one by writing the appropriate number in the box.

The first rating (A) is concerned with how important the activity is to the successful performance or your job; the second rating (B) is concerned with how well you currently perform that activity.

| **B**: How well do you consider that you currently perform this activity?  Rating of 1- 7: not well = 1; very well = 7 |
| --- |

| **A**: How important is this activity to the successful  performance of your job? Rating of 1- 7 - not at all  important = 1; very important = 7 |
| --- |

|  | **A** | **B** |
| --- | --- | --- |
| 1. Establishing a relationship with students |  |  |
| 2. Completing relevant documentation |  |  |
| 3. Appraising your own performance in addressing sexual and reproductive health issues of students |  |  |
| 4. Getting on with your colleagues |  |  |
| 5. Communicating effectively with students, colleagues and parents |  |  |
| 6. Identifying areas related to sexual and reproductive health that should be systematically addressed |  |  |
| 7. Academic advisory to students |  |  |
| 8. Introducing new ideas at work |  |  |
| 9. Finding information that can assist in teaching |  |  |
| 10. Providing feedback to other colleagues addressing sexual and reproductive health issues |  |  |
| 11. Giving information to parents |  |  |
| 12. Showing colleagues and/or students how to do things |  |  |
| 13. Organizing your own time effectively |  |  |
| 14. Using technical equipment, including computers |  |  |
| 15. Undertaking health promotion activities |  |  |
| 16. Making do with limited resources |  |  |
| 17. Student’s assessment methods |  |  |
| 18. Preparing notes related to sexual and reproductive health |  |  |
| 19. Identifying areas worthy of investigation in sexual and reproductive health issues in your practice |  |  |
| 20. Working as a member of a team |  |  |
| 21. Locating and accessing relevant equipment, resources and supplies for your work |  |  |
| 22. Undertaking administrative activities |  |  |
| 23. Personally coping with change in the education service |  |  |
| 24. Participating in problem solving in school |  |  |
| 25. Knowledge on legislations and laws related to sexual and reproductive health |  |  |
| 26. Skills of effective presentation and lecturing |  |  |
| 27. Teaching and learning skills |  |  |
| 28. Participate in training and qualification of academic staff |  |  |
| 29. Recognizing and managing risk related to sexual and reproductive health |  |  |
| 30. Prioritizing your work according to students needs |  |  |
| 31. Assessing students psychological and social needs |  |  |
| 32. Evidence generation like research and audits on sexual and reproductive health |  |  |
